# Supplementary material for: Towards Safe Medication Use Among Geriatric Patients: A Combined Tool For Identification of Potential Drug-Related Problems
Source: Research Square preprint supplement (doi:10.21203/rs.3.rs-156489/v1), 2021-02-02
Supplement: Supplementary file 1 [file 6305db877c32235edfada805.xlsx]

## Sheet: Title page
Towards safe medication use among geriatric patients: a combined tool for identification of potential drug-related problems
Veera Bobrova1,*, Daniela Fialová2,3, Shane Desselle4, Jyrki Heinämäki1, and Daisy Volmer1
1 Institute of Pharmacy, Faculty of Medicine, University of Tartu, Nooruse Str. 1, 50411 Tartu, Estonia
2 Department of Social and Clinical Pharmacy, Faculty of Pharmacy in Hradec Králové, Charles University, Czech Republic (post code: 50005)
3 Department of Geriatrics and Gerontology, 1st Faculty of Medicine, Charles University, Czech Republic (post code: 120 00)
4 Touro University California College of Pharmacy, Vallejo, CA, USA
ORCID:
Veera Bobrova 0000-0002-6282-8589
Daniela Fialová 0000-0001-5638-9690
Shane Desselle 0000-0002-5987-1391
Jyrki Heinämäki 0000-0002-5996-5144
Daisy Volmer 0000-0001-6742-5044
*Corresponding Author:
Veera Bobrova
Institute of Pharmacy, Faculty of Medicine,
University of Tartu,
Nooruse Str. 1, 50411 Tartu,
Estonia
Tel.: +372 737 5298
E-mail: veera.bobrova@ut.ee

## Sheet: Appendix 1
Red and Red* color PIMs with marketing authorization in Estonia
	Defined daily doses (DDD), 2019	PIM volume sales (number of packages) in community pharmacies, October 2019-September 2020	PIM volume sales (number of packages) in hospital pharmacies, October 2019-September 2020	The EU(7)-PIM criteria (PIM class; main reason for PIM)1	The EURO-FORTA criteria (FORTA class; main reason for PIM=indication)2	SmPC specific alerts for geriatric population (EMA, EST), October 2020	Result
Prescription (Rx) PIMs
Baclofen4	0,0106 (P); 0,1912 (O)ET	6204	178	A; risk of anticholinergic and CNS side effects including orthostatic hypotension, falls, sedation, weakness, confusion, amnesia	no information	yes	Red* PIM
Dronedarone	0,0120 (O)	183	no information	A; frequent drug interactions; prolonged QT interval; not recommended in permanent atrial fibrillation; increased mortality due to cardiovascular causes	D; arterial fibrillation, infarction	yes	Red PIM
Glipizide	0,1901 (O)	3060	13	A; risk of protracted hypoglycemia	no information	yes	Red* PIM
Insulin, sliding scale	no information	no information	no information	A; no benefits demonstrated in using sliding-scale insulin; might facilitate fluctuations in glycemic levels	no information (B for insulins in general)	yes	Red* PIM
Nitrofurantoin	0,5830 (O)	39109	2610	A; when used >1 week; unfavorable risk/benefit ratio, particularly with long-term use (pulmonary side effects, liver damage, etc.); contraindicated if severe renal failure due to decreased excretion and increased risk of toxicity	no information	yes	Red* PIM
Piracetam	0,2424 (O)	8367	230	A; no efficacy proven; unfavorable risk/benefit profile	D; dementia	yes	Red PIM
Pramipexole	0,3856 (O)	16919	118	A; side effects include orthostatic hypotension, GI tract symptoms, hallucinations, confusion, insomnia, peripheral oedema	B; Parkinson’s disease	yes	Red* PIM
Propafenone	3,5660 (O); 0,0039 (P)	62398	1600	A; high risk of drug interactions	D; arterial fibrillation, infarction	yes	Red PIM
Over-the-Counter (OTC) PIMs
Dextromethorphan 3	0,6223 (O)	no information	no information	A; no clear evidence in the treatment of acute cough	D; COPD	not found	Red PIM
Ginkgo biloba 5	2,3355 (O)OTC	no information	no information	A; no efficacy proven; increased risk of orthostatic hypotension and fall	D, dementia	not found	Red PIM
Magnesium hydroxide 3, 5	1,187 (O)	no information	no information	A; risk of hypermagnesemia, which is higher in moderate to severe renal failure	no information	not found	Red* PIM
Senna glycosides 5, 6	no informationOTC 0,0132 (O)RT	no information	no information	A; adverse events include abdominal pain, fluid and electrolyte imbalance and hypoalbuminemia; may exacerbate bowel disfunction	no information	yes, only EMA	Red* PIM
Sodium picosulfate 6	4,3637 (O)	57244	755	A; adverse events include abdominal pain, fluid and electrolyte imbalance and hypoalbuminemia; may exacerbate bowel dysfunction	no information	yes	Red* PIM
Dietary and other oral supplements
Aloe	no information	no information	no information	A; abdominal pain, fluid and electrolyte imbalance and hypoalbuminemia, may exacerbate bowel disfunction	no information	not found	Red* PIM
Red and Red* color Rx PIMs not authorized in Estonia but still marketed (ET, RT)
Flecainide	0,1362 (O)ET; 0,0002 (P)RT	1963	59	A; higher rate of adverse effects, especially in older adults	D, arterial fibrillation, infarction	yes	Red PIM
Niacin (=Nicotinic acid)	0,0002 (P)RT	380	200	A; moderate risk of side effects; ineffective for the treatment of dementia	D; infarction	yes	Red PIM
Tranylcypromine	0,0050 (O)RT	33	no information	A; irreversible MAO inhibitor; risk of hypertensive crises, cerebral hemorrhage and malignant hyperthermia	no information	yes	Red* PIM
Quinidine	no informationRT	no information	no information	A; CNS side effects; increased mortality	D, arterial fibrillation, infarction	yes	Red PIM
Red and Red* color PIMs not authorized and not marketed in Estonia
Norephedrine (=Phenylpropanol-amine)	not appliable	not appliable	not appliable	A; higher risk of elevation of blood pressure secondary to sympathomimetic activity	no information	not found	Red* PIM
Acetyldigoxin				A; elevated glycoside sensitivity in older adults (women >men); risk of intoxication	no information	not found	Red* PIM
Alizapride				A; no proven efficacy; muscarinic-blocking agents; side effects such as confusion and sedation	no information	not found	Red* PIM
Disopyramide				A; potent negative inotrope; anticholinergic side effects; may induce heart failure; may cause sudden cardiac death	D; arterial fibrillation, infarction	yes, only EMA	Red PIM
Docusate sodium				A; stool softener laxative; adverse events include cramping, nausea, diarrhea; may exacerbate bowel disfunction	no information	not found	Red* PIM
Ergotamine				A; unfavorable risk/benefit profile	no information	yes, only EMA	Red* PIM
Ethylmorphine				A; no clear evidence in the treatment of acute cough	D; COPD	not found	Red PIM
Meprobamate				A; risk of drowsiness, confusion	no information	yes, only EMA	Red* PIM
Methocarbamol				A; risk of anticholinergic and CNS side effects including orthostatic hypotension, falls, sedation, weakness, confusion, amnesia	no information	yes, only EMA	Red* PIM
Metildigoxin				A; elevated glycoside sensitivity (women >men); risk of intoxication	no information	not found	Red* PIM
Metopimazine				A; no proven efficacy; muscarinic blocking agent; side effects such as confusion and sedation	no information	not found	Red* PIM
Procainamide				A; high risk of drug interactions	D; arterial fibrillation, infarction	not found	Red PIM
Quinidine + verapamil				A; CNS side effects and increased mortality	no information	yes, only EMA	Red* PIM
Selegiline				A; increased risk of orthostatic hypotension and dizziness	C (D); Parkinson’s disease and D; dementia	not found	Red PIM
Tetrazepam				A; risk of anticholinergic and CNS side effects including orthostatic hypotension, falls, sedation, weakness, confusion, amnesia	no information	not found	Red* PIM
Viscous paraffin (=Liquid paraffin, oral)				A; pulmonary side effects if aspirated	no information	not found	Red* PIM
1 Renom-Guiteras A, Meyer G, Thürmann, PA. The EU(7)-PIM list: a list of potentially inappropriate medications for older people consented by experts from seven European countries. Eur J Clin Pharmacol. 2015; https://doi.org/10.1007/s00228-015-1860-9
2 Pazan F, Weiss C, Wehling M. The EURO-FORTA (Fit fOR The Aged) List: International Consensus Validation of a Clinical Tool for Improved Drug Treatment in Older People. Drugs Aging. 2018; https://doi.org/10.1007/s40266-017-0514-2
3 used in combinations with other active ingredients
4 oral drug use is available only as ET medication
5 used both as OTC and food supplement
6 used in addition as RT drug
DDD - defined daily doses
EMA - European Medicines Agency
PIM - potentially inappropriate medication
SmPC - Summaries of Product Characteristics
ET (Erialaorganisatsiooni Taotlusega ravimid, est) and RT (Ravimiameti Taotlusega ravimid, est): used by application of specialized physician, hospitals or research institutions
(P): parenteral medication use
(O): oral medication use
